# Supplementary material
Source: publisher figshare collection journal article supplement (https://acs.figshare.com/ndownloader/files/8257916)
Supplement: Supplementary file 1 [file 8257916]

## Supporting Information for

Keith Van Ryswyk<sup>\*1</sup>, Angelos T. Anastasopoulos<sup>1</sup>, Greg Evans<sup>2</sup>, Liu Sun<sup>1</sup>, Kelly Sabaliauskas<sup>2</sup>, Ryan Kulka<sup>1</sup>, Lance Wallace<sup>3</sup>, Scott Weichenthal<sup>1,4</sup>

<sup>1</sup> Air Health Science Division, Health Canada, Ottawa, Canada, K1A 0K9

<sup>2</sup> University of Toronto, Department of Chemical Engineering and Applied Chemistry, Toronto, Canada, M5S 3E5

<sup>3</sup> Consultant, Santa Rosa, California, United States, 95409

<sup>4</sup> McGill University, Department of Epidemiology, Biostatistics, and Occupational Health, Montreal, Canada, H3A 1A2

\*Corresponding Author

269 Laurier Ave West, Ottawa, Ontario, Canada, K1A 0K9

Telephone: 613-957-2617, Fax: 613-954-7612 Email: [Keith.VanRyswyk@hc-sc.gc.ca](mailto:Keith.VanRyswyk@hc-sc.gc.ca)

Number of pages- 22

Number of figures- 11

Number of tables- 6

## **Exposure assessment methods, QA/QC, and exposure descriptives.**

### *Gravimetric sampling methods and elemental data compilation*

Flow rates for gravimetric samples were measured at the beginning and end of each three-hour session and samples were stored in sealed bags between each session. Samples were deemed valid if they sampled successfully for 75% of the 30 hours with an average flow within 10% of the target 4 litres per minute (lpm). Field blanks were deployed (10% of field samples) and analysed with active samples. Teflon filters were weighed pre- and post- sampling after a 24-hour preconditioning period. After gravimetric analysis, Teflon filters were analysed for elemental composition using inductively coupled plasma-mass spectrometry (ICP-MS) for 36 elements. Median field blank concentrations found to be greater than the lab detection limit were used to blank-correct both gravimetric and elemental results. Microaethalometer data were integrated to a 1-week period to correspond to the integrated PM<sub>2.5</sub> samples and their associated elemental datasets. This was done to include black carbon into the source apportionment analysis.

### *Continuous data QA/QC*

Quality control for continuous measurements was ensured by factory calibration before each seasonal campaign. After each seasonal campaign, co-located inter-comparative sampling sessions were completed (i.e., concurrent monitoring by all units for at least one hour of a small burning event) to permit quantification of instrument precision, bias, and overall limit of detection as per Wallace et al (2011)<sup>1</sup>. Table S1

provides the descriptive statistics of these co-location sessions along with the limit of detection, bias and bias-corrected precision estimates. Continuous DustTrak sampling data for PM<sub>2.5</sub> agreed well with the filter-based time-integrated PM samples in all three cities. While the DustTrak has been noted to over-predict PM exposures relative to gravimetric methods in ambient environments, the inter-method ratio was very close to unity (Figure S2) in the metro environments sampled. This could be on account of the larger fraction of traditionally crustal materials (in this case metallic materials) increasing the density of particles up to the Arizona road dust used in calibration. The DustTrak units were checked for zero drift before and after each three-hour sampling session.

#### *Continuous data management*

The internal clocks of all continuous instruments, including digital voice recorders (DVRs), were synchronized to the technicians' computers on a daily basis. Continuous data were merged at one-second intervals and assigned to a rail segment or station based on DVR recordings of station names and boarding/disembarking activities. One-second GPS latitude and longitude values were converted into Universal Transverse Mercator (UTM) values to allow averaging of UTM  $x$  and UTM  $y$  coordinate values. Missing UTM data due to lost satellite signal while riding in subterranean portions of the metro systems were supplemented by inputting the known metro station coordinates while waiting on platforms. For riding periods, the linear extrapolation of the departed and destination station coordinates was used. All continuous data were then averaged by rail segment/station and sampling week.

### *Continuous data coverage*

Sampling covered the entirety of each system with the exception of the ‘yellow line’ of the Montreal metro. This line comprises two stations and two rail segments and was omitted for logistical reasons. The stations and rail segments of each metro were sampled continually over the course of each three week sampling period. Since all routes were covered within each three hour sampling period, resulting in numerous visits to each station and rail segment (Table S2). On average, the study collected over two hours of continuous data at each station and rail segment of each metro.

### *Integrated sampling*

Table S4 presents concentrations and percent of samples above detection for PM<sub>2.5</sub> samples collected with personal environment monitors along with the elemental results of PM<sub>2.5</sub> samples by ICP-MS. Gravimetric analyses found all samples to be above detection limit. Detection limits for PM<sub>2.5</sub>-associated elements are species-specific. A high percentage of samples were found to be above detection for all elements. Gravimetric and elemental blank corrections were not conducted because median blank values were below detection in all cities and seasons. All PM<sub>2.5</sub> samples were valid in Toronto and Vancouver. In Montreal three PM samples were lost due to pump failures. This yielded a dataset of 18 PM<sub>2.5</sub> samples in Toronto and Vancouver and 15 samples in Montreal. All valid PM<sub>2.5</sub> samples were analysed for elemental composition.

### *System factors*

Depth values for each platform and rail segment in the Toronto and Vancouver metros were estimated as the number of steps from surface to platform multiplied by step riser height. For Montreal, depth was obtained from the Montreal transit authority for each platform. Depths of rail segments were assigned the mean depth of the two adjoining platforms. ‘Elevation’ was defined as meters above sea level for each station and rail segment. This metric provided a measure for the vertical position of a segment of the metro, relative to the rest of the system. This metric was also independent of ‘depth’. ‘Percent coverage’ was defined as proportion of a station or rail segment covered or below grade. Stations were assigned 0% (above-grade) or 100% (below-grade). Rail segments were assigned a continuous value by review of metro network information using ArcGIS. ‘Distance to outside’ was calculated for each GPS point as the distance to the closest above-grade station or rail segment. Other design features such as year of construction were also considered.

Table S1: Descriptive statistics of co-location sampling conducted after each sampling session with limits of detection, bias and precision.

| Instrument<br>(pollutant &<br>units)                     | Session*      | N<br>units | time<br>(hours) | mean  | limit of<br>detection | Bias   |              | Bias-Corrected<br>Precision(%) |         |
|----------------------------------------------------------|---------------|------------|-----------------|-------|-----------------------|--------|--------------|--------------------------------|---------|
|                                                          |               |            |                 |       |                       | median | range        | Median                         | Range   |
| DustTrak<br>(PM <sub>2.5</sub> )<br>(µg/m <sup>3</sup> ) | T&M<br>summer | 7          | 9.0             | 2.79  | 3.2                   | 1      | 0.6 –<br>1.4 | 21                             | 14-31   |
|                                                          | T&M winter    | 6          | 22.7            | 38.5  | 10                    | 1.1    | 1.0 –<br>1.2 | 27                             | 16-38   |
|                                                          | V winter      | 7          | 1.4             | 12.9  | 3                     | 1.1    | 0.7 –<br>1.4 | 30                             | 21-36   |
|                                                          | V summer      | 7          | 1.4             | 6.83  | 3                     | 1.2    | 0.3 –<br>1.9 | 27                             | 23-45   |
| CPC<br>(UFP)<br>(pts/cm <sup>3</sup> )                   | T&M<br>summer | 7          | 8.9             | 4527  | 1573                  | 1.1    | 0.5 –<br>1.6 | 19                             | 8-28    |
|                                                          | T&M winter    | 6          | 3.4             | 11096 | 1211                  | 1      | 0.6 –<br>1.3 | 22                             | 10-43.6 |
|                                                          | V winter      | 5          | 1.5             | 35346 | 3547                  | 1      | 0.9 –<br>1.1 | 14                             | 3-22    |
|                                                          | V summer      | 8          | 1.2             | 5249  | 2418                  | 1      | 0.8 –<br>1.1 | 10                             | 5-14    |
| Micro Aeth<br>(Black Carbon)<br>(ng/m <sup>3</sup> )     | T&M<br>summer | 8          | 12.9            | 1579  | 208                   | 1.1    | 0.9 –<br>1.1 | 6                              | 4-33    |
|                                                          | T&M winter    | 4          | 3.1             | 1584  | 100                   | 1.1    | 0.8 –<br>1.4 | 5                              | 2-24    |
|                                                          | V winter      | 6          | 1.5             | 212   | 218                   | 0.8    | 0.4 –<br>1.5 | 17                             | 12-36   |
|                                                          | V summer      | 5          | 0.5             | 370   | 302                   | 1.4    | 0.3 –<br>1.8 | 25                             | 11-31   |

\*T&M = Toronto & Montreal, V = Vancouver

Table S2. Descriptive statistics for quantity of continuous exposure data collected by system and station/rail segment

| City             | Status        | n       | minutes of data |     | n visits |    |
|------------------|---------------|---------|-----------------|-----|----------|----|
|                  |               | sampled | mean            | SD  | mean     | SD |
| Toronto,<br>ON   | stations      | 64      | 231             | 80  | 66       | 20 |
|                  | rail segments | 67      | 229             | 113 | 95       | 38 |
| Montreal,<br>QC  | stations      | 66      | 256             | 88  | 57       | 21 |
|                  | rail segments | 67      | 152             | 54  | 78       | 22 |
| Vancouver,<br>BC | Stations      | 47      | 342             | 115 | 94       | 33 |
|                  | rail segments | 47      | 273             | 102 | 128      | 42 |

Table S3. Metro exposures by season, riding/waiting, and above/below grade.

| pollutant                                     | value       | Toronto |                     | Montreal <sup>a</sup> |                   | Vancouver |                   |
|-----------------------------------------------|-------------|---------|---------------------|-----------------------|-------------------|-----------|-------------------|
|                                               |             | n       | median (Q1-Q3)      | n                     | median (Q1-Q3)    | n         | median (Q1-Q3)    |
| PM <sub>2.5</sub><br>(µg/m <sup>3</sup> )     | winter      | 381     | 82.3 (57.8-126.1)   | 399                   | 46.9 (37.2-56.1)  | 282       | 24.4 (19.6-31.1)  |
|                                               | summer      | 337     | 119.6 (78.4-165.9)† | 396                   | 26.3 (21.9-34.4)† | 282       | 11.3 (9-18.6)†    |
|                                               | riding      | 361     | 80.8 (61.2-106.8)   | 402                   | 36.3 (27.3-48.3)  | 282       | 18.6 (11.7-24.9)  |
|                                               | waiting     | 357     | 140 (78.9-183.5)†   | 393                   | 35.2 (25.2-46.5)  | 282       | 20.6 (10.9-32)‡   |
|                                               | above-grade | 102     | 46.7 (31.2-74.5)    | -                     | -                 | 423       | 15.1 (10.1-23.5)  |
|                                               | below-grade | 616     | 106.4 (73-157.7)†   | 795                   | 35.6 (25.8-47.4)  | 141       | 39.7 (26.1-61.2)† |
| UFP<br>(10 <sup>3</sup> pts/cm <sup>3</sup> ) | winter      | 381     | 10.5 (7.3-15.8)     | 399                   | 23.5 (17.9-31.7)  | 282       | 18.3 (11.4-28.2)  |
|                                               | summer      | 287     | 7.2 (5.6-9.6)†      | 376                   | 11.6 (9.1-15.9)†  | 282       | 3.8 (3.1-5.2)†    |
|                                               | riding      | 337     | 6.7 (5.2-9.8)       | 393                   | 17.2 (12.3-24.5)  | 282       | 6 (3.4-16.5)      |
|                                               | waiting     | 331     | 11 (8.7-16.6)†      | 382                   | 17.1 (11.3-24.1)  | 282       | 8.3 (4.9-21.4)†   |
|                                               | above-grade | 100     | 12 (7.2-16.3)       | -                     | -                 | 422       | 6.8 (3.6-15)      |
|                                               | below-grade | 568     | 8.8 (5.9-11.6)†     | 775                   | 17.1 (11.6-24.4)  | 142       | 11 (4.6-24.2)†    |
| BC<br>(ng/m <sup>3</sup> )                    | winter      | 267     | 2.6 (1.4-5.2)       | 399                   | 4.8 (3.6-7)       | 282       | 2.8 (1.9-3.6)     |
|                                               | summer      | 324     | 9.6 (6.4-14.4)†     | 396                   | 3.5 (2.6-4.5)†    | 282       | 1.4 (1-2.6)†      |
|                                               | riding      | 304     | 4.6 (2.3-7.9)       | 402                   | 4.3 (3.2-5.5)     | 282       | 2 (1.3-3.1)       |
|                                               | waiting     | 287     | 8 (3.7-14.8)†       | 393                   | 3.9 (2.8-5.3)‡    | 282       | 2.1 (1.2-4)       |
|                                               | above-grade | 97      | 3.2 (2-6.5)         | -                     | -                 | 423       | 1.6 (1.1-2.6)     |
|                                               | below-grade | 494     | 6.9 (3.4-11.6)†     | 795                   | 4.1 (3-5.4)       | 141       | 4.4 (3.2-7.2)†    |

<sup>a</sup> metro system entirely below grade; ‡ p<0.05; † p<0.0001



**Table S4. Ambient and metro PM<sub>2.5</sub> elemental concentrations and abundance ratios (ARs) in all three cities.**

| City                | element | 'Metro PM <sub>2.5</sub> *<br>n = (T=18;M=15;V=18) |                                       |                        | Ambient PM <sub>2.5</sub> *<br>n = (T=17;M=23;V=19) |                                      |                        |
|---------------------|---------|----------------------------------------------------|---------------------------------------|------------------------|-----------------------------------------------------|--------------------------------------|------------------------|
|                     |         | % detected                                         | median (IQR)<br>(ng/m <sup>3</sup> )* | median abundance ratio | % detected                                          | median (IQR)<br>(ng/m <sup>3</sup> ) | median abundance ratio |
| Toronto,<br>Ontario | Al      | 100                                                | 441.3 (262.5-513.7)                   | 0.00464                | 100                                                 | 8.8 (6.5-15.7)                       | 0.00070                |
|                     | As      | 100                                                | 4.2 (2.7-5.3)                         | 0.00005                | 100                                                 | 0.4 (0.3-0.7)                        | 0.00003                |
|                     | Ba      | 100                                                | 1609.6 (899.3-1843.7)                 | 0.01654                | 100                                                 | 2.5 (1.6-3.0)                        | 0.00018                |
|                     | Cd      | 100                                                | 0.33 (0.23-0.45)                      | 0.00000                | 100                                                 | 0.10 (0.06-0.15)                     | 0.00001                |
|                     | Cr      | 100                                                | 132.46 (90.82-173.19)                 | 0.00156                | 100                                                 | 0.42 (0.38-0.58)                     | 0.00003                |
|                     | Cu      | 100                                                | 381.6 (319.2-442.0)                   | 0.00443                | 100                                                 | 2.4 (1.7-3.2)                        | 0.00018                |
|                     | Fe      | 100                                                | 52191 (31501-61540)                   | 0.54844                | 100                                                 | 17 (10-34)                           | 0.00162                |
|                     | Mn      | 100                                                | 431.0 (241.8-513.7)                   | 0.00431                | 100                                                 | 1.3 (1.0-2.2)                        | 0.00011                |
|                     | Mo      | 100                                                | 8.2 (6.2-10.5)                        | 0.00010                | 100                                                 | 0.2 (0.1-0.3)                        | 0.00001                |
|                     | Ni      | 100                                                | 19.8 (14.4-27.0)                      | 0.00025                | 88                                                  | 0.3 (0.2-0.3)                        | 0.00002                |
|                     | Pb      | 100                                                | 53.3 (48.8-69.5)                      | 0.00069                | 100                                                 | 2.2 (1.3-2.5)                        | 0.00012                |
|                     | Sr      | 100                                                | 6.3 (5.0-8.1)                         | 0.00010                | 100                                                 | 0.5 (0.4-0.7)                        | 0.00004                |
|                     | V       | 100                                                | 2.9 (1.6-3.2)                         | 0.00003                | 94                                                  | 0.3 (0.1-0.4)                        | 0.00002                |
|                     | Zn      | 100                                                | 131 (85-167)                          | 0.00154                | 100                                                 | 18 (10-33)                           | 0.00120                |
| Montreal,<br>Quebec | Al      | 100                                                | 235.1 (92.5-270.6)                    | 0.00681                | 100                                                 | 7.5 (4.2-12.5)                       | 0.00076                |
|                     | As      | 100                                                | 0.7 (0.6-1.1)                         | 0.00003                | 100                                                 | 0.3 (0.2-0.6)                        | 0.00004                |
|                     | Ba      | 100                                                | 2.9 (2.5-3.1)                         | 0.00010                | 100                                                 | 1.0 (0.5-2.0)                        | 0.00011                |
|                     | Cd      | 100                                                | 0.45 (0.24-0.58)                      | 0.00001                | 100                                                 | 0.08 (0.06-0.15)                     | 0.00001                |
|                     | Cr      | 100                                                | 4.04 (2.06-5.36)                      | 0.00015                | 48                                                  | 0.20 (0.15-0.32)                     | 0.00002                |

|                                   |    |     |                       |         |     |                  |         |
|-----------------------------------|----|-----|-----------------------|---------|-----|------------------|---------|
|                                   | Cu | 100 | 1646.9 (680.8-2126.3) | 0.05605 | 91  | 1.4 (0.7-3.1)    | 0.00014 |
|                                   | Fe | 100 | 1416.1 (651.9-1503.4) | 0.04314 | 100 | 7.8 (4.1-26.1)   | 0.00113 |
|                                   | Mn | 100 | 19.8 (9.4-24.0)       | 0.00067 | 100 | 0.9 (0.6-2.1)    | 0.00010 |
|                                   | Mo | 100 | 0.76 (0.46-0.96)      | 0.00003 | 57  | 0.08 (0.04-0.23) | 0.00001 |
|                                   | Ni | 100 | 5.8 (2.7-7.5)         | 0.00018 | 70  | 0.2 (0.1-0.4)    | 0.00002 |
|                                   | Pb | 100 | 15.0 (9.4-21.0)       | 0.00048 | 100 | 1.3 (0.6-2.6)    | 0.00015 |
|                                   | Sr | 100 | 1.8 (0.6-2.3)         | 0.00005 | 100 | 0.4 (0.2-0.6)    | 0.00004 |
|                                   | V  | 100 | 0.9 (0.6-1.1)         | 0.00003 | 87  | 0.4 (0.1-1.0)    | 0.00003 |
|                                   | Zn | 100 | 60 (33-90)            | 0.00206 | 100 | 14 (7-29)        | 0.00120 |
| Vancouver,<br>British<br>Columbia | Al | 100 | 34.7 (26.0-58.8)      | 0.00208 | 100 | 5.9 (3.9-10.1)   | 0.00110 |
|                                   | As | 100 | 1.0 (0.8-1.6)         | 0.00007 | 100 | 0.3 (0.2-0.4)    | 0.00005 |
|                                   | Ba | 100 | 5.9 (3.8-7.3)         | 0.00034 | 100 | 1.3 (1.0-2.0)    | 0.00026 |
|                                   | Cd | 100 | 0.16 (0.08-0.22)      | 0.00001 | 58  | 0.03 (0.02-0.06) | 0.00001 |
|                                   | Cr | 100 | 22.78 (7.72-45.29)    | 0.00154 | 11  | 0.19 (0.18-0.25) | 0.00003 |
|                                   | Cu | 100 | 40.8 (35.6-57.8)      | 0.00221 | 100 | 1.5 (1.2-2.1)    | 0.00033 |
|                                   | Fe | 100 | 1954 (526-6029)       | 0.17091 | 100 | 6 (4-10)         | 0.00123 |
|                                   | Mn | 100 | 24.0 (11.9-63.4)      | 0.00226 | 100 | 1.9 (0.7-3.3)    | 0.00042 |
|                                   | Mo | 100 | 5.9 (1.6-78.3)        | 0.00063 | 74  | 0.1 (0.1-0.2)    | 0.00003 |
|                                   | Ni | 100 | 9.1 (6.3-19.8)        | 0.00078 | 95  | 0.5 (0.2-0.8)    | 0.00008 |
|                                   | Pb | 100 | 4.7 (2.1-9.8)         | 0.00032 | 100 | 0.9 (0.6-1.4)    | 0.00015 |
|                                   | Sr | 100 | 0.6 (0.4-0.9)         | 0.00004 | 100 | 0.2 (0.2-0.3)    | 0.00003 |
|                                   | V  | 100 | 5.5 (1.9-7.7)         | 0.00031 | 100 | 1.0 (0.4-1.7)    | 0.00016 |
|                                   | Zn | 100 | 29 (22-47)            | 0.00245 | 100 | 8 (7-13)         | 0.00161 |

Table S5. Spearman's correlation analysis for PM<sub>2.5</sub>, UFP, and black carbon exposures measured by continuous samplers in below-grade sections of metros.

| city          | pollutant         | n   | Spearman's correlation |      |      |
|---------------|-------------------|-----|------------------------|------|------|
|               |                   |     | PM <sub>2.5</sub>      | UFP  | BC   |
| Toronto, ON   | PM <sub>2.5</sub> | 616 | 1.00                   | 0.12 | 0.52 |
|               | UFP               | 564 |                        | 1.00 | 0.20 |
|               | BC                | 493 |                        |      | 1.00 |
| Montreal, QC  | PM <sub>2.5</sub> | 795 | 1.00                   | 0.49 | 0.51 |
|               | UFP               | 775 |                        | 1.00 | 0.09 |
|               | BC                | 795 |                        |      | 1.00 |
| Vancouver, BC | PM <sub>2.5</sub> | 141 | 1.00                   | 0.14 | 0.90 |
|               | UFP               | 140 |                        | 1.00 | 0.11 |
|               | BC                | 141 |                        |      | 1.00 |

Table S6. Spearman's correlation analysis for PM<sub>2.5</sub>, UFP, and black carbon exposures measured by continuous samplers in above-grade sections of metros.

| city          | pollutant         | n   | Spearman's correlation |       |       |
|---------------|-------------------|-----|------------------------|-------|-------|
|               |                   |     | PM <sub>2.5</sub>      | UFP   | BC    |
| Toronto, ON   | PM <sub>2.5</sub> | 102 | 1.00                   | -0.34 | 0.57  |
|               | UFP               | 96  |                        | 1.00  | -0.20 |
|               | BC                | 91  |                        |       | 1.00  |
| Vancouver, BC | PM <sub>2.5</sub> | 423 | 1.00                   | 0.72  | 0.73  |
|               | UFP               | 421 |                        | 1.00  | 0.59  |
|               | BC                | 423 |                        |       | 1.00  |

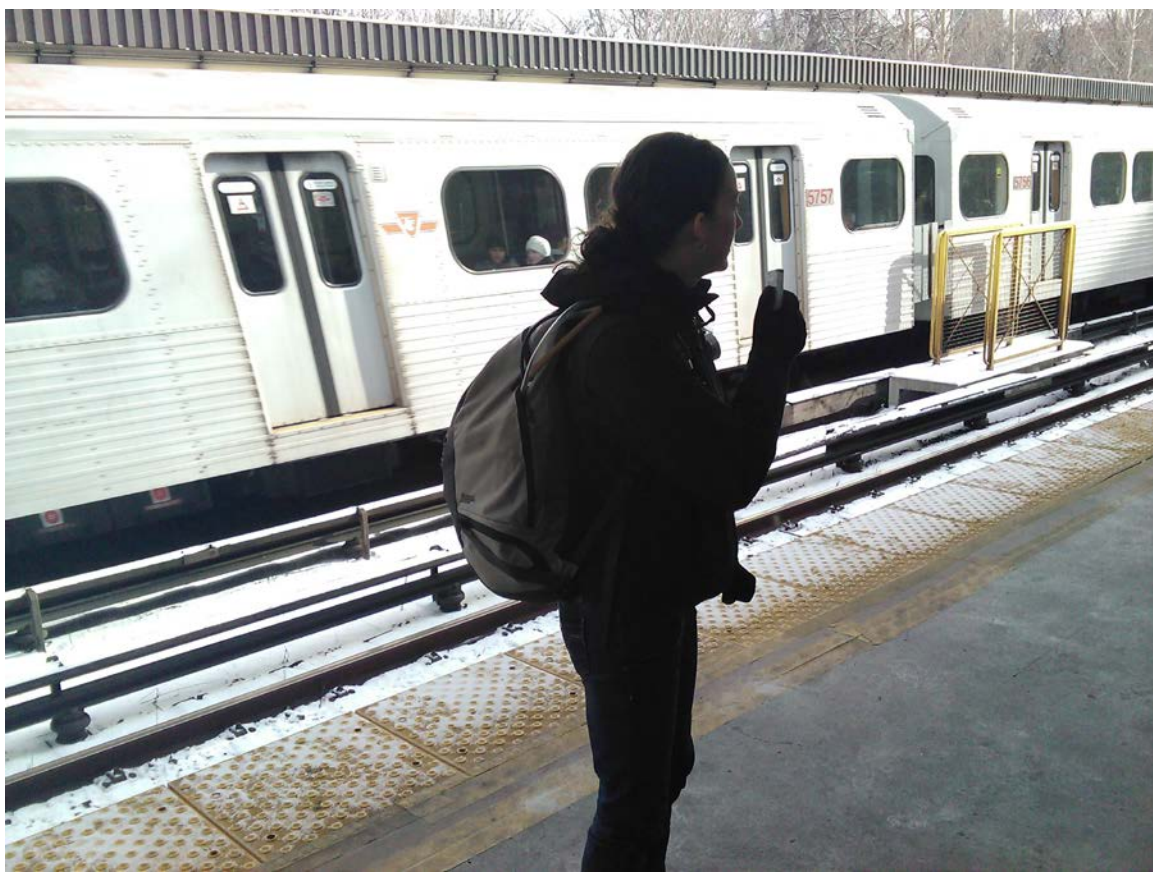

**Figure S1.** Field technician sampling setup.

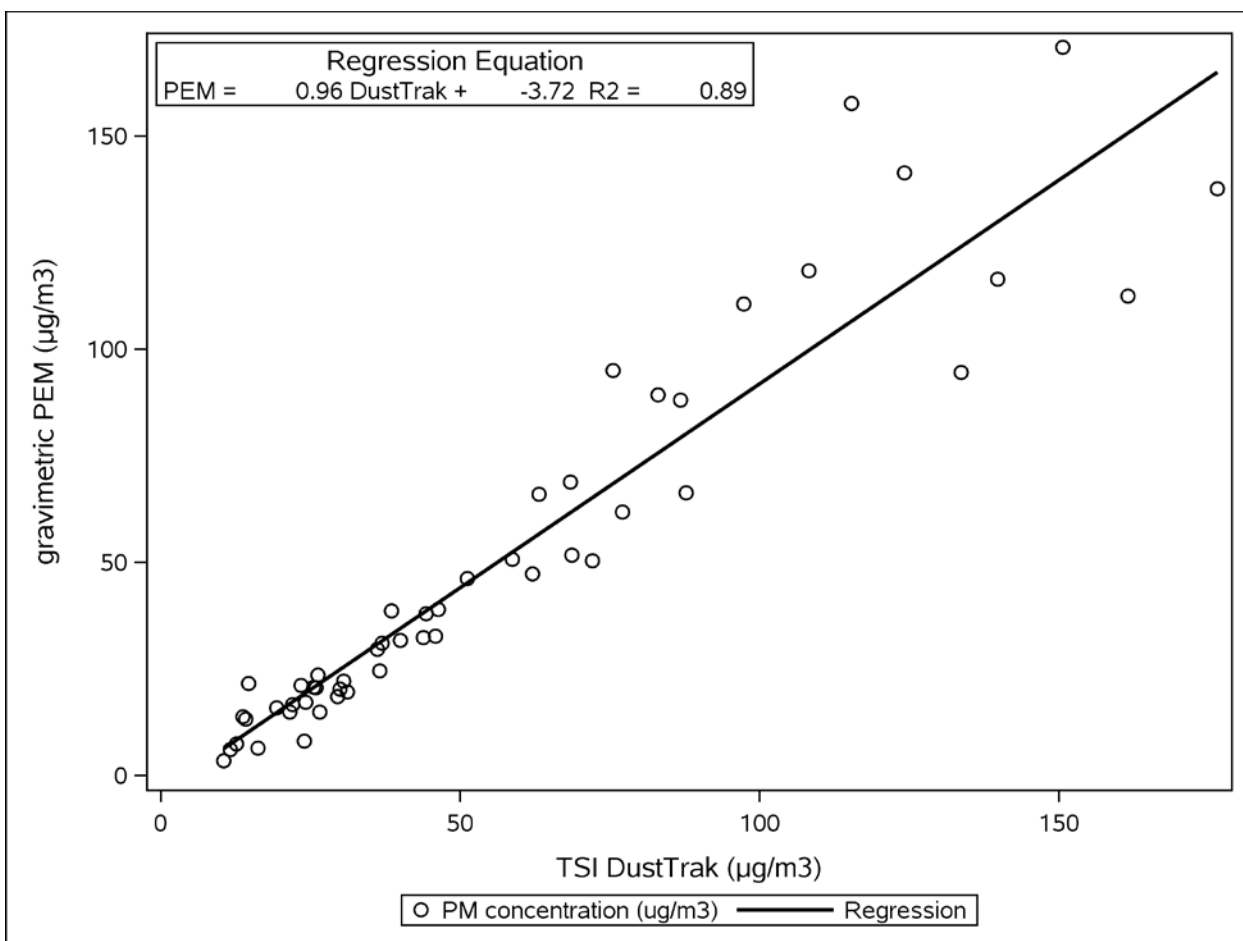

**Figure S2. Inter-instrument agreement for PM<sub>2.5</sub> continuous monitor (DustTrak) and integrated filter-based samplers.**

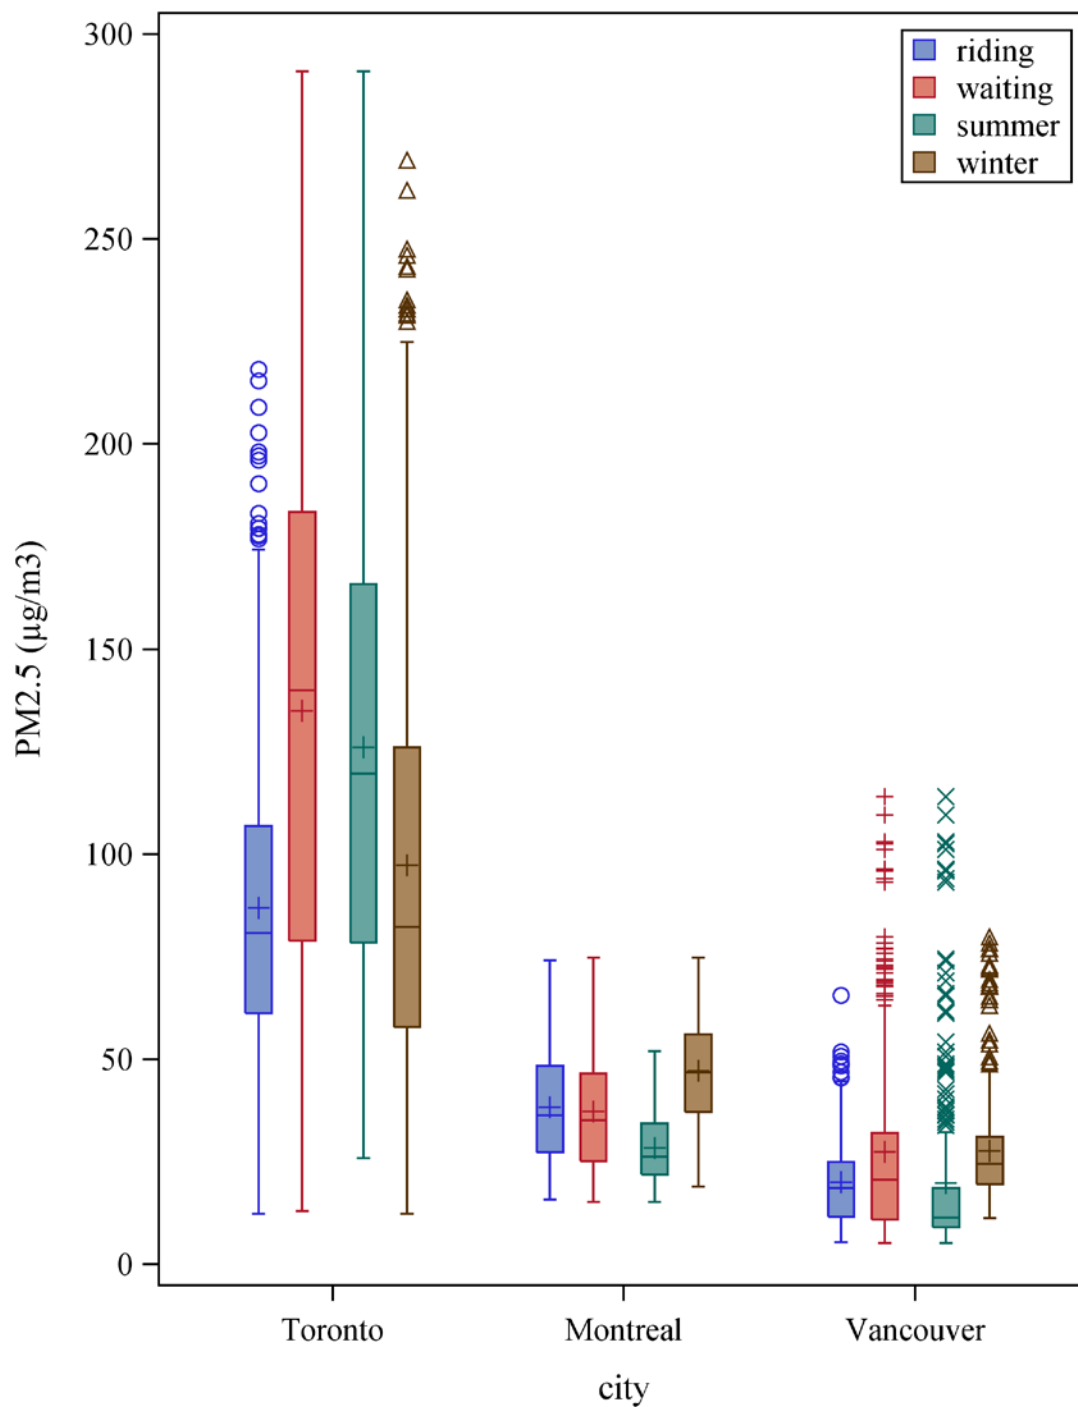

**Figure S3: PM2.5 exposures sampled in Toronto, Montreal and Vancouver metros.**

+ = mean, line=median, box=p25 & p75, tails=min & max (of values within 1.5IQR), emarkers=obs>1.5IQR

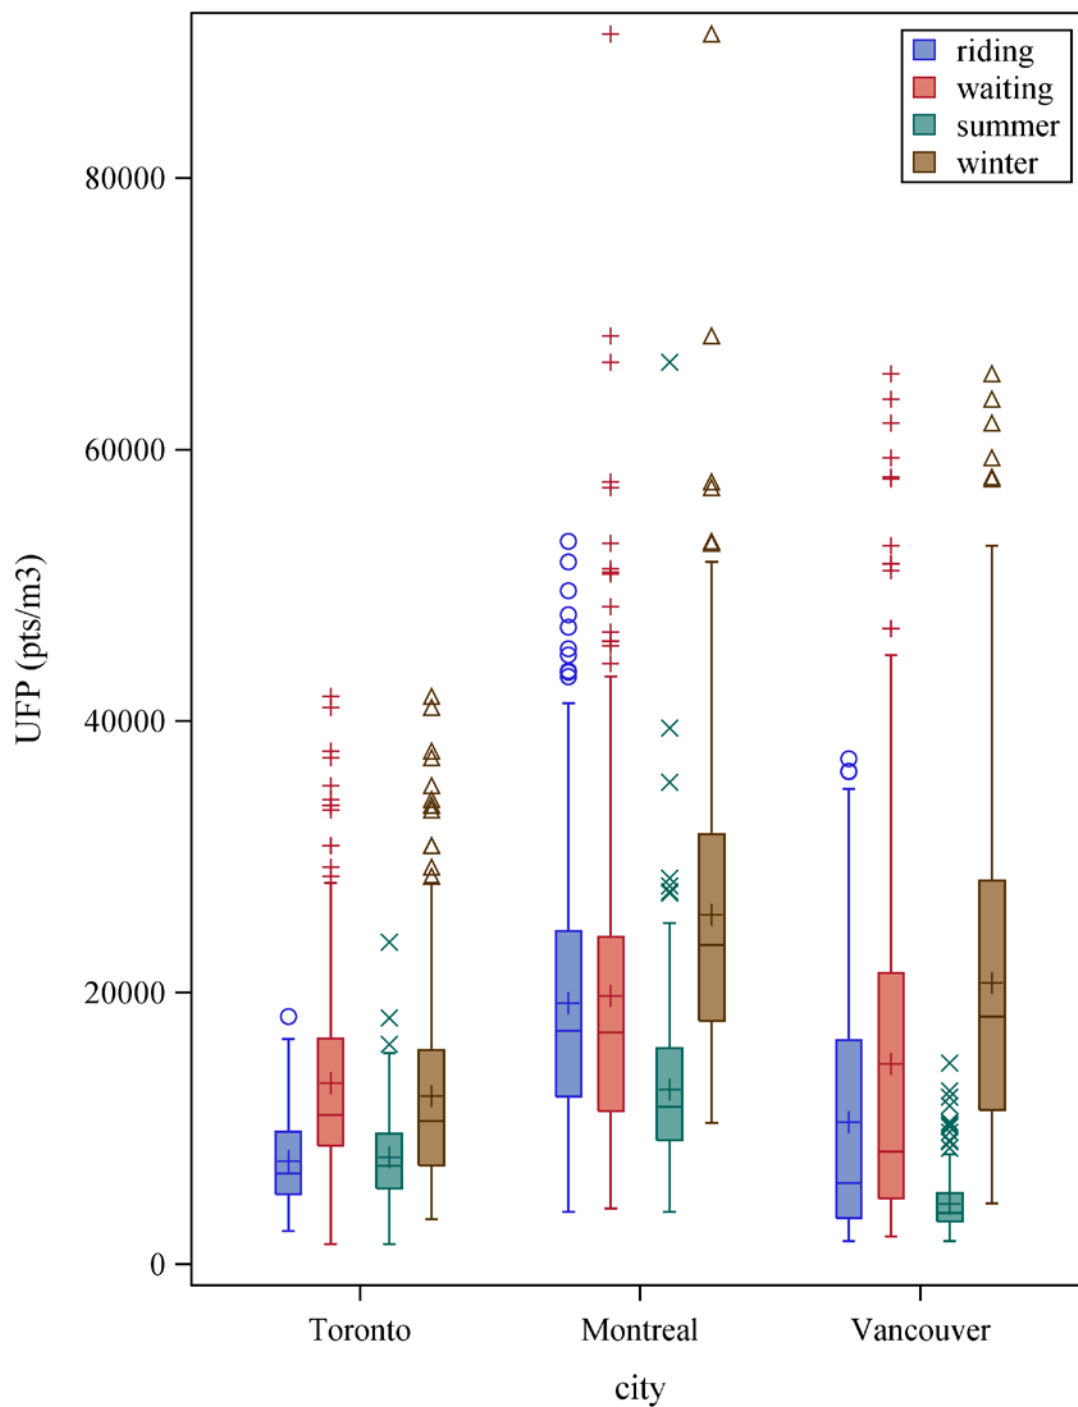

Figure S4: UFP exposures sampled in Toronto, Montreal and Vancouver metros.

+ = mean, line=median, box=p25 & p75, tails=min & max (of values within 1.5IQR),  
emarkers=obs>1.5IQR

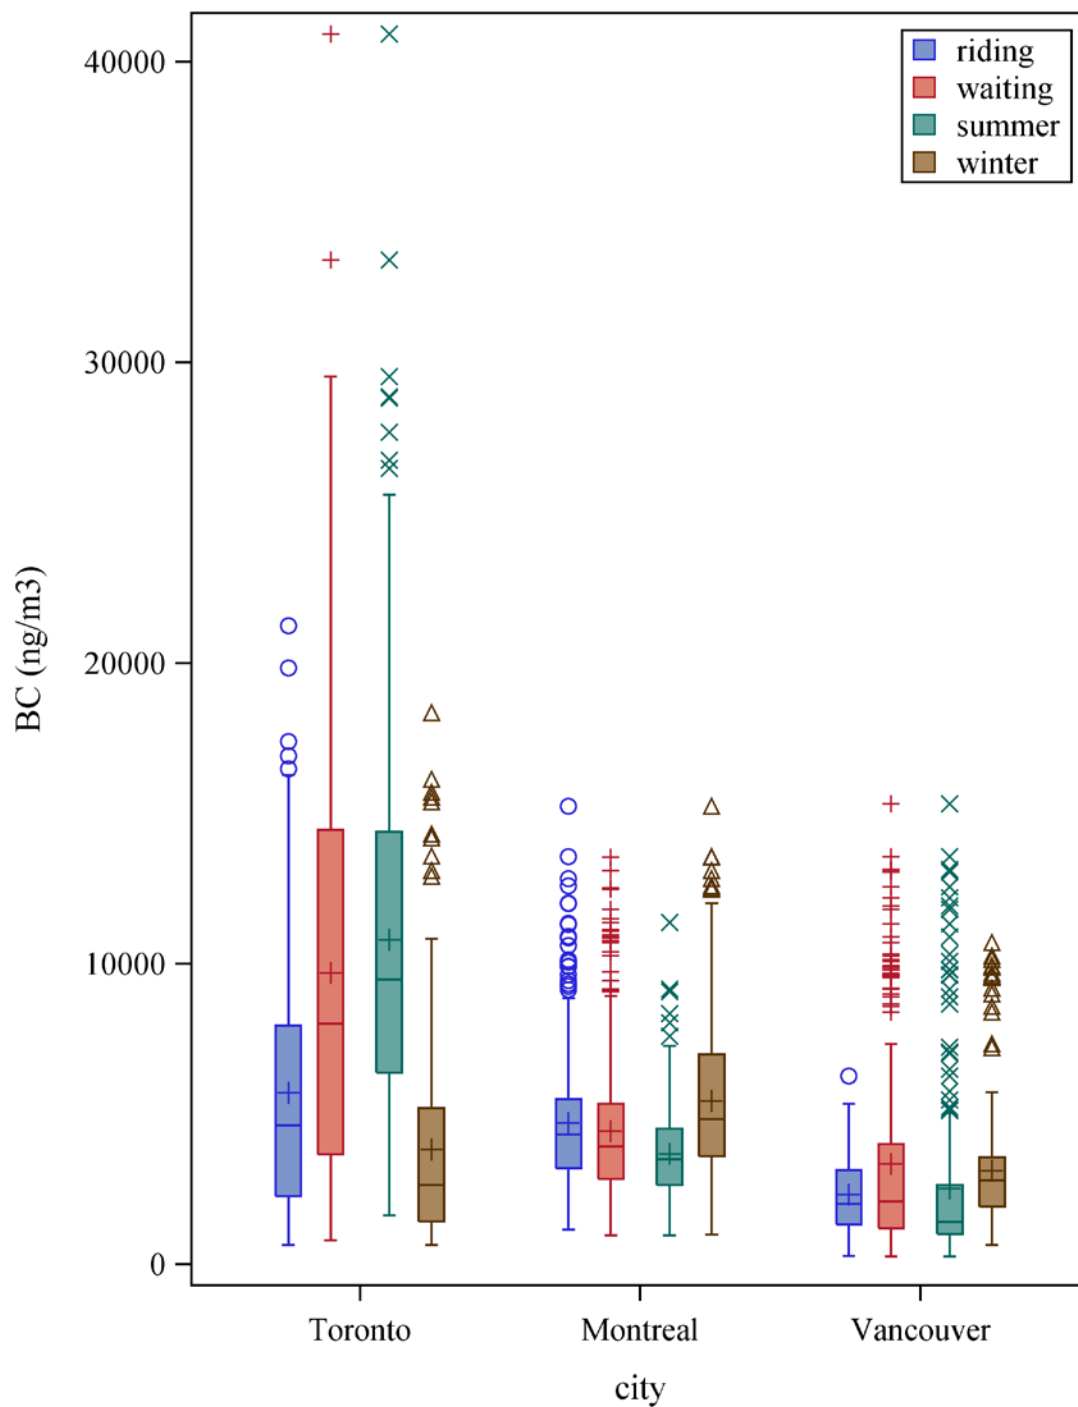

Figure S5: BC exposures sampled in Toronto, Montreal and Vancouver metros.

+ = mean, line=median, box=p25 & p75, tails=min & max (of values within 1.5IQR),  
emarkers=obs>1.5IQR



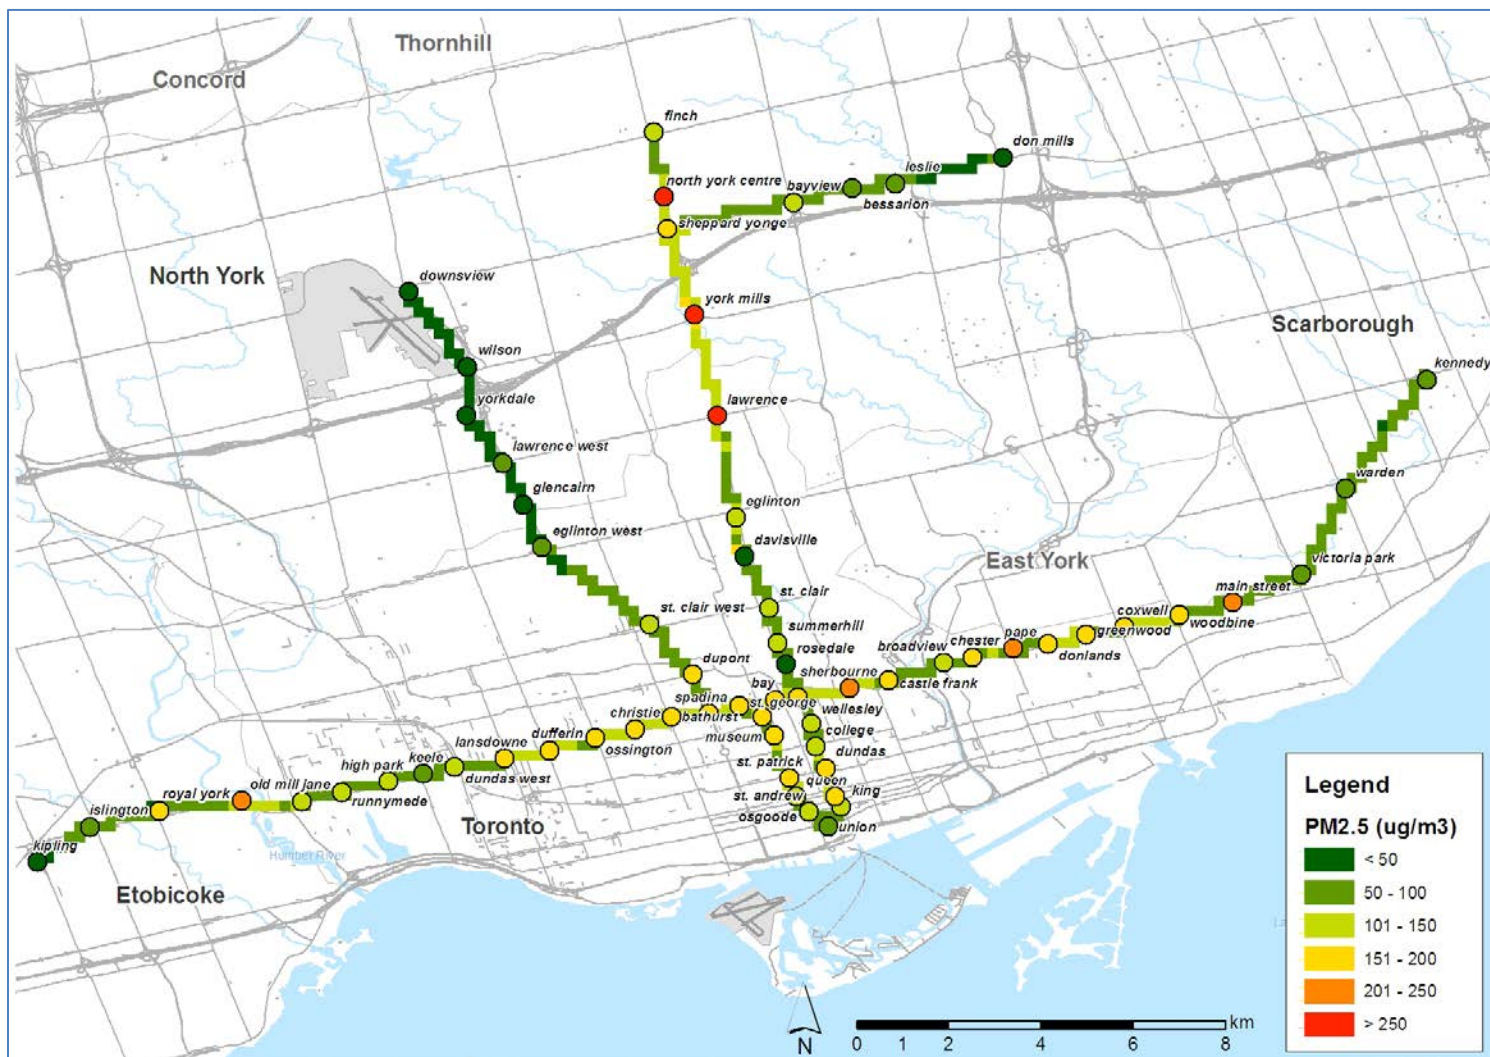

Figure S6. Spatial means of PM<sub>2.5</sub> across Toronto metro system

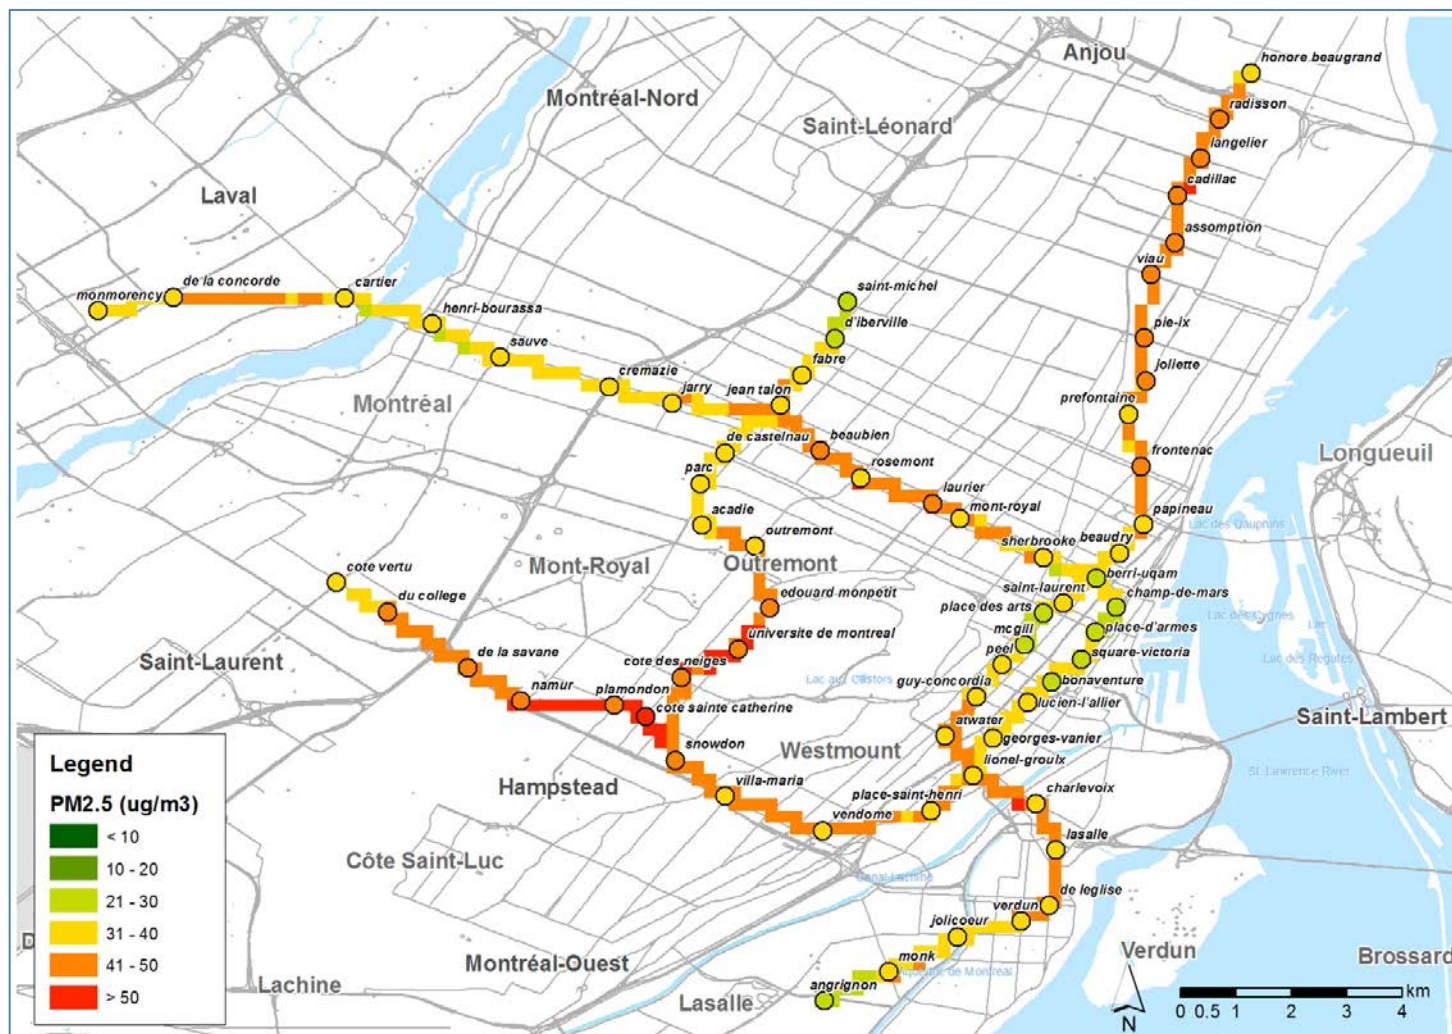

Figure S7. Spatial means of PM<sub>2.5</sub> across Montreal metro system

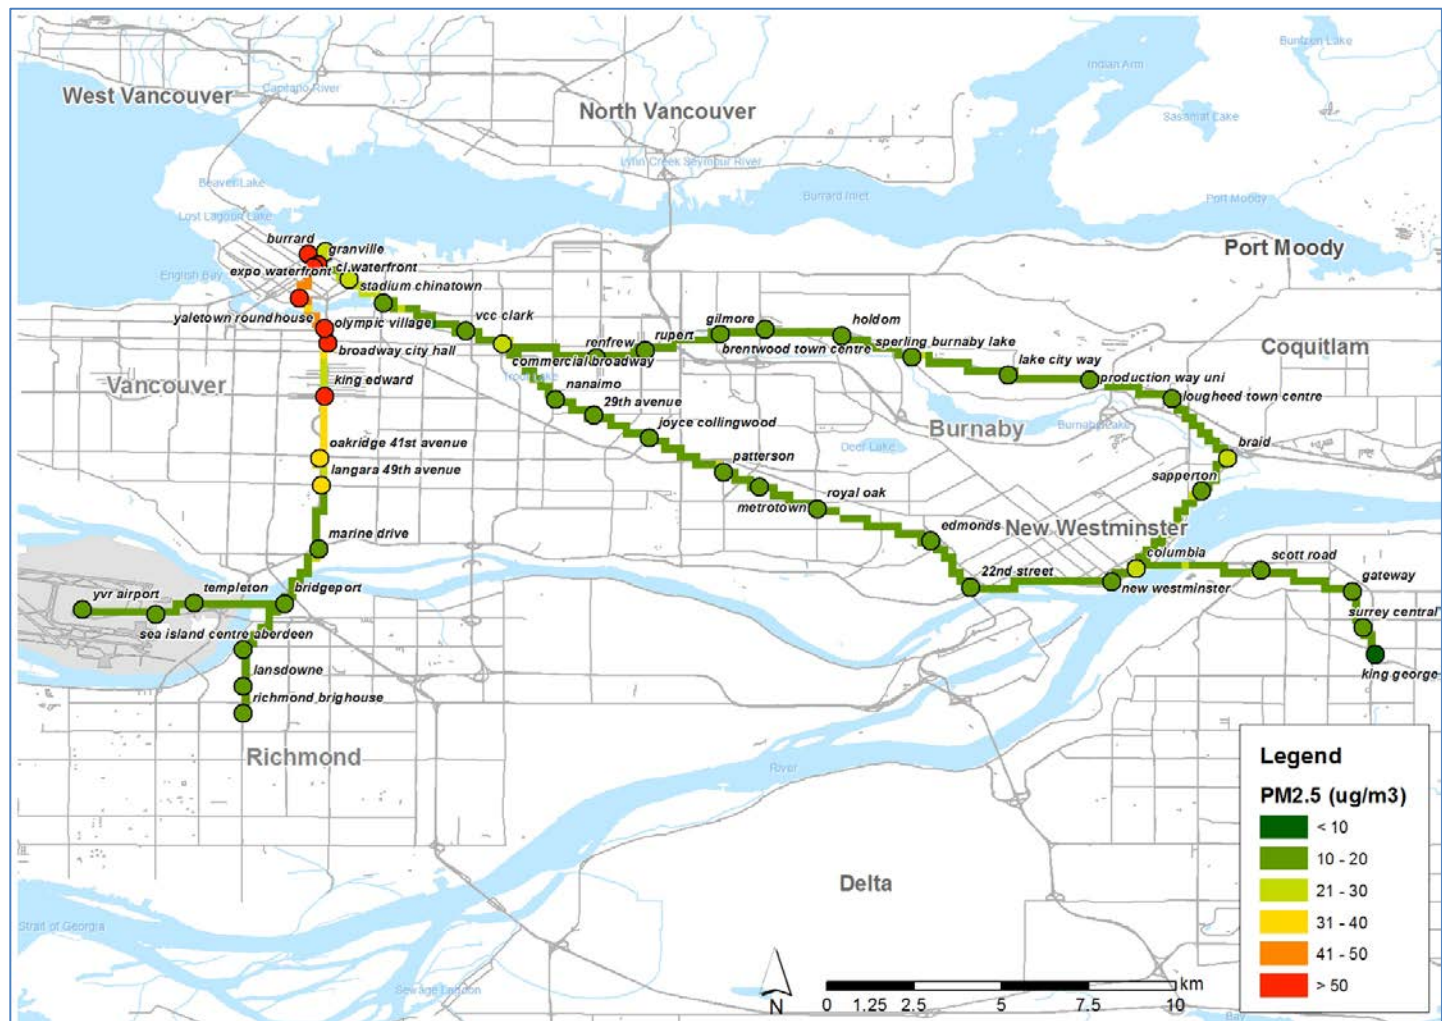

Figure S8. Spatial means of PM<sub>2.5</sub> across Vancouver metro system



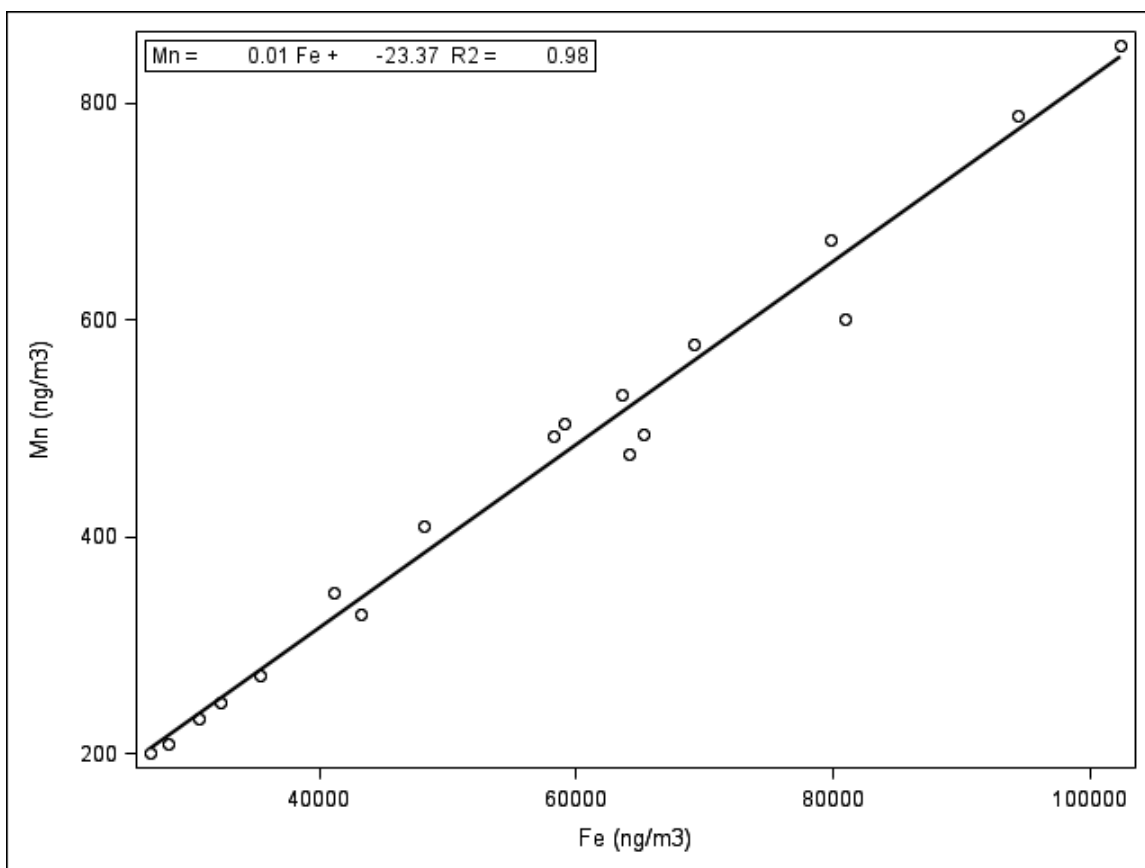

**Figure S9. Correlation of Fe and Mn in Toronto metro PM<sub>2.5</sub> samples.**

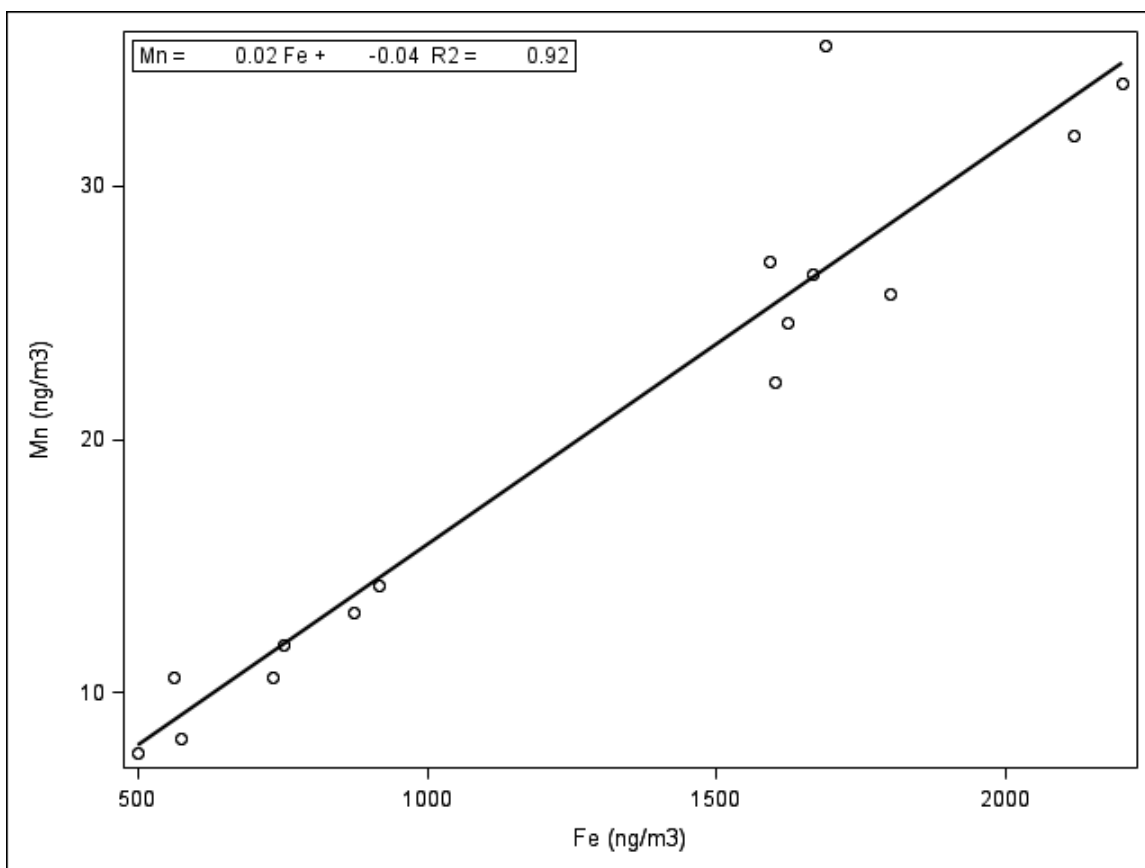

**Figure S10. Correlation of Fe and Mn in Montreal metro PM<sub>2.5</sub> samples.**

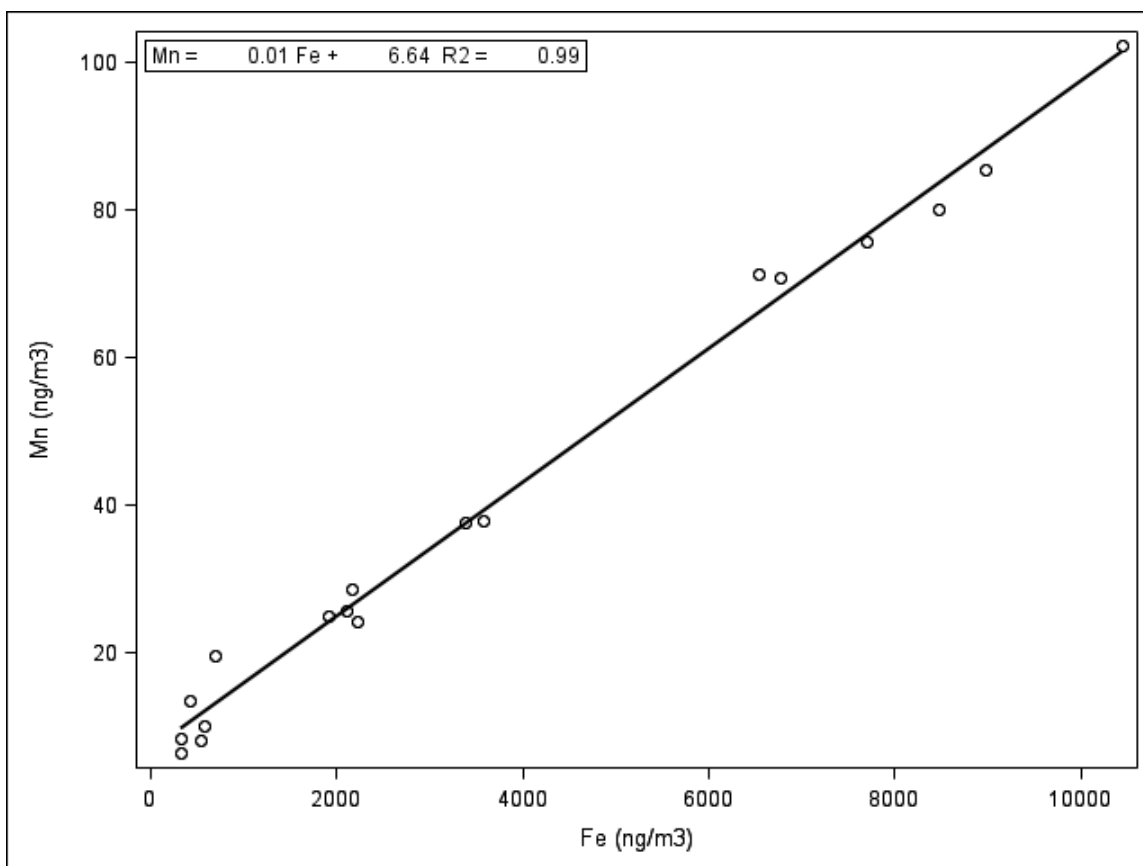

**Figure S11. Correlation of Fe and Mn in Vancouver metro PM<sub>2.5</sub> samples.**

### References

1. Wallace, L. A., Wheeler, A. J., Kearney, J., Van Ryswyk, K., You, H., Kulka, R., Rasmussen, P., Brook, J., Xu, I. Validation of continuous particle monitors for personal, indoor, and outdoor exposures. *J Expos Sci Environ Epidemiol*. 2011;21(1):49-64. Accessed 12 July 2016. doi: 10.1038/jes.2010.15.
